# Supplementary material for: The value of transhumance for biodiversity conservation: Vulture foraging in relation to livestock movements
Source: PubMed Central journal article supplement (PMC8931130; doi:10.1007/s13280-021-01668-x), 2021-12-07
Supplement: 13280_2021_1668_MOESM1_ESM.pdf [file 13280_2021_1668_MOESM1_ESM.pdf]

Supplementary material for

## **The value of transhumance for biodiversity conservation: vulture foraging in relation to livestock movements**

### **Index**

**Table S1.** GPS device settings and time elapsed between consecutive locations.

**Table S2.** Details of griffon vultures tagged and tracking.

**Table S1.** GPS device settings and time elapsed between consecutive locations. Devices were activated one hour before sunrise and turned off one hour after sunset. High-performance settings were active continuously except if we detected a low battery status for several days. We then activated the low-performance setting until the battery recovered normal status. During the study period, the time between consecutive locations ranged from 5 seconds to 14.9 h with a median of 5 min.

|                          | Battery status |          |                         |                      |
|--------------------------|----------------|----------|-------------------------|----------------------|
|                          | Full           | Non-full | Close to security level | Under security level |
| Low-performance setting  | 10 min         | 30 min   | 1 h                     | 1 day                |
| High-performance setting | 5 min          | 20 min   | 30 min                  | 1 day                |

**Table S2.** Details of griffon vultures tagged and tracking. The table shows fixes recorded during the period 2015-2018, the number of monitored months and the number of breeding years for each tagged individual.

| <b>Individual</b> | <b>Sex</b> | <b>No. fixes</b> | <b>No. months</b> | <b>No. breeding years</b> |
|-------------------|------------|------------------|-------------------|---------------------------|
| L73               | Male       | 35539            | 49                | 4                         |
| L8J               | Male       | 5552             | 45                | 1                         |
| T00               | Female     | 11043            | 49                | 4                         |
| T01               | Female     | 10185            | 45                | 3                         |
| T02               | Male       | 14850            | 22                | 2                         |
| T03               | Male       | 6764             | 40                | 3                         |
| T05               | Male       | 49161            | 49                | 4                         |
| T06               | Male       | 8965             | 9                 | 0                         |
| T07               | Male       | 3177             | 14                | 1                         |
| T08               | Female     | 22062            | 47                | 4                         |
| T09               | Male       | 42442            | 49                | 4                         |
| T0A               | Male       | 20769            | 46                | 3                         |
| T0C               | Male       | 56490            | 49                | 3                         |
| T0H               | Male       | 31780            | 49                | 1                         |
| T0J               | Female     | 37920            | 49                | 3                         |
| T0L               | Male       | 11991            | 9                 | 0                         |
| T0U               | Female     | 18603            | 25                | 2                         |
| T0V               | Male       | 5551             | 43                | 3                         |
| T0W               | Female     | 9778             | 14                | 2                         |
| T0X               | Male       | 15831            | 22                | 2                         |
| T10               | Female     | 6030             | 11                | 1                         |
| T11               | Male       | 21468            | 49                | 0                         |
| T12               | Male       | 8197             | 33                | 3                         |
| T14               | Male       | 6747             | 43                | 1                         |
| T15               | Female     | 36000            | 49                | 3                         |
| T16               | Male       | 779              | 33                | 1                         |
| T17               | Male       | 22698            | 49                | 0                         |
| T19               | Female     | 9471             | 23                | 2                         |
| T1C               | Female     | 5751             | 32                | 3                         |
| T1J               | Female     | 20640            | 49                | 3                         |
